# Supplementary material for: Prevalence of Ophthalmological Manifestations in Patients with Inborn Errors of Immunity: A Systematic Review and Meta-Analysis
Source: Springer Nature journal article supplement (doi:10.1007/s10875-025-01880-4), 2025-05-13
Supplement: MOESM1 [file 10875_2025_1880_MOESM1_ESM.pdf]

## Supplementary Data

### 1. Supplementary methods.

Meta-analysis of Observational Studies in Epidemiology (MOOSE) and 'Preferred Reporting Items for Systematic Review and Meta-analysis 'PRISMA, chart.

| Reporting Criteria                                                                                              | Reported (Yes/No) | Reported on Page No. |
|-----------------------------------------------------------------------------------------------------------------|-------------------|----------------------|
| <b>Reporting of Background</b>                                                                                  |                   |                      |
| Problem definition                                                                                              | Yes               | 3                    |
| Hypothesis statement                                                                                            | Yes               | 3                    |
| Description of Study Outcome(s)                                                                                 | Yes               | 3                    |
| Type of exposure or intervention used                                                                           | No                |                      |
| Type of study design used                                                                                       | Yes               | 3                    |
| Study population                                                                                                | Yes               | 3                    |
| <b>Reporting of Search Strategy</b>                                                                             |                   |                      |
| Qualifications of searchers (eg, librarians and investigators)                                                  | No                |                      |
| Search strategy, including time period included in the synthesis and keywords                                   | Yes               | 4                    |
| Effort to include all available studies, including contact with authors                                         | Yes               | 4                    |
| Databases and registries searched                                                                               | Yes               | 4                    |
| Search software used, name and version, including special features used (eg, explosion)                         | Yes               | 4                    |
| Use of hand searching (eg, reference lists of obtained articles)                                                | Yes               | 4                    |
| List of citations located and those excluded, including justification                                           | Yes               | 4-5                  |
| Method for addressing articles published in languages other than English                                        | No                |                      |
| Method of handling abstracts and unpublished studies                                                            | Yes               | 4-5                  |
| Description of any contact with authors                                                                         | No                |                      |
| <b>Reporting of Methods</b>                                                                                     |                   |                      |
| Description of relevance or appropriateness of studies assembled for assessing the hypothesis to be tested      | Yes               | 4-5                  |
| Rationale for the selection and coding of data (eg, sound clinical principles or convenience)                   | Yes               | 5                    |
| Documentation of how data were classified and coded (eg, multiple raters, blinding, and interrater reliability) | Yes               | 5                    |
| Assessment of confounding (eg, comparability of cases and controls in studies where appropriate)                | No                |                      |

| Reporting Criteria                                                                                                                                                                                                                                                           | Reported (Yes/No)                                                                                                    | Reported on Page No.               |
|------------------------------------------------------------------------------------------------------------------------------------------------------------------------------------------------------------------------------------------------------------------------------|----------------------------------------------------------------------------------------------------------------------|------------------------------------|
| Assessment of study quality, including blinding of quality assessors; stratification or regression on possible predictors of study results                                                                                                                                   | <input type="text" value="Yes"/>                                                                                     | <input type="text" value="5-6"/>   |
| Assessment of heterogeneity                                                                                                                                                                                                                                                  | <input type="text" value="Yes"/>                                                                                     | <input type="text" value="7"/>     |
| Description of statistical methods (eg, complete description of fixed or random effects models, justification of whether the chosen models account for predictors of study results, dose-response models, or cumulative meta-analysis) in sufficient detail to be replicated | <input type="text" value="Yes"/>                                                                                     | <input type="text" value="7"/>     |
| Provision of appropriate tables and graphics                                                                                                                                                                                                                                 | <input type="text" value="Yes"/>                                                                                     | <input type="text" value="24-34"/> |
| <b>Reporting of Results</b>                                                                                                                                                                                                                                                  |                                                                                                                      |                                    |
| Table giving descriptive information for each study included                                                                                                                                                                                                                 | <input type="text" value="Yes"/>                                                                                     | <input type="text" value="24-30"/> |
| Results of sensitivity testing (eg, subgroup analysis)                                                                                                                                                                                                                       | <input type="text" value="Yes"/>                                                                                     | <input type="text" value="11"/>    |
| Indication of statistical uncertainty of findings                                                                                                                                                                                                                            | <input type="text" value="Yes"/>                                                                                     | <input type="text" value="8-11"/>  |
| <b>Reporting of Discussion</b>                                                                                                                                                                                                                                               |                                                                                                                      |                                    |
| Quantitative assessment of bias (eg, publication bias)                                                                                                                                                                                                                       | <input type="text" value="Yes"/>                                                                                     | <input type="text" value="13-14"/> |
| Justification for exclusion (eg, exclusion of non-English-language citations)                                                                                                                                                                                                | <input type="text" value="No"/>  | <input type="text"/>               |
| Assessment of quality of included studies                                                                                                                                                                                                                                    | <input type="text" value="Yes"/>                                                                                     | <input type="text" value="14"/>    |
| <b>Reporting of Conclusions</b>                                                                                                                                                                                                                                              |                                                                                                                      |                                    |
| Consideration of alternative explanations for observed results                                                                                                                                                                                                               | <input type="text" value="Yes"/>                                                                                     | <input type="text" value="12-15"/> |
| Generalization of the conclusions (ie, appropriate for the data presented and within the domain of the literature review)                                                                                                                                                    | <input type="text" value="Yes"/>                                                                                     | <input type="text" value="15"/>    |
| Guidelines for future research                                                                                                                                                                                                                                               | <input type="text" value="Yes"/>                                                                                     | <input type="text" value="12-15"/> |
| Disclosure of funding source                                                                                                                                                                                                                                                 | <input type="text" value="Yes"/>                                                                                     | <input type="text" value="15"/>    |

## Search strategy

SEARCH STRATEGY PUBMED – DATE 21 MARCH 2022

| Search                               | Search                                                                                                                                                                                                                                                                                                                                                                                                                                                                                                                                                                                                                                                                                                                             |
|--------------------------------------|------------------------------------------------------------------------------------------------------------------------------------------------------------------------------------------------------------------------------------------------------------------------------------------------------------------------------------------------------------------------------------------------------------------------------------------------------------------------------------------------------------------------------------------------------------------------------------------------------------------------------------------------------------------------------------------------------------------------------------|
| Search Strategy<br>Results<br>n=2510 | ((("genetic diseases, inborn"[MeSH Terms] AND "Immunologic Deficiency Syndromes"[MeSH Terms]) OR ("Congenital Abnormalities"[MeSH Terms] AND "Immune System Diseases"[MeSH Terms]) OR "Primary Immunodeficiency Diseases"[MeSH Terms]) AND ("Eye Diseases"[MeSH Terms] OR "Eye Manifestations"[MeSH Terms] OR "Eye Abnormalities"[MeSH Terms] OR "Eye Infections"[MeSH Terms] OR "eye infections, bacterial"[MeSH Terms] OR "eye infections, fungal"[MeSH Terms] OR "eye infections, parasitic"[MeSH Terms] OR "eye infections, viral"[MeSH Terms] OR ("Uveitis"[MeSH Terms] OR "uveitis, intermediate"[MeSH Terms] OR "uveitis, posterior"[MeSH Terms] OR "uveitis, suppurative"[MeSH Terms] OR "uveitis, anterior"[MeSH Terms])) |

#### SEARCH STRATEGY EMBASE– DATE 21 MARCH 2022

| Search                               | Search                                                                                                                                                                                                                                                                                                                                                                                                                                                                                                                                                                                                                                                                                                                                                                                                                                                                                                                                                                                                                                                                                                                                                                                                                                                                                                                                                                                                                                                                                                                                                                                                                                                                                                                                                                                                                                                                                                                                                                                                                                                                                                                                                                                                                                                                                                           |
|--------------------------------------|------------------------------------------------------------------------------------------------------------------------------------------------------------------------------------------------------------------------------------------------------------------------------------------------------------------------------------------------------------------------------------------------------------------------------------------------------------------------------------------------------------------------------------------------------------------------------------------------------------------------------------------------------------------------------------------------------------------------------------------------------------------------------------------------------------------------------------------------------------------------------------------------------------------------------------------------------------------------------------------------------------------------------------------------------------------------------------------------------------------------------------------------------------------------------------------------------------------------------------------------------------------------------------------------------------------------------------------------------------------------------------------------------------------------------------------------------------------------------------------------------------------------------------------------------------------------------------------------------------------------------------------------------------------------------------------------------------------------------------------------------------------------------------------------------------------------------------------------------------------------------------------------------------------------------------------------------------------------------------------------------------------------------------------------------------------------------------------------------------------------------------------------------------------------------------------------------------------------------------------------------------------------------------------------------------------|
| Search Strategy<br>Results<br>n=3731 | ((('immune deficiency'/exp OR 'deficiency, immune' OR 'immune defect' OR 'immune deficiency' OR 'immune deficiency disease' OR 'immune deficiency syndrome' OR 'immune deficit' OR 'immune depression' OR 'immune incompetence' OR 'immune response depression' OR 'immunity deficiency' OR 'immuno deficiency disease' OR 'immuno deficiency syndrome' OR 'immunodeficiency' OR 'immunodeficiency disease' OR 'immunodeficiency syndrome' OR 'immunodepression' OR 'immunologic deficiency' OR 'immunologic deficiency disease' OR 'immunologic deficiency syndrome' OR 'immunologic deficiency syndromes' OR 'immunological deficiency' OR 'immunological deficiency disease' OR 'immunosuppression, passive' OR 'immunosuppression, pathology' OR 'pathology of immunosuppression' OR 'primary immunodeficiency' OR 'primary immunodeficiency diseases' OR 'secondary immunodeficiency') AND ('monogenic disorder'/exp OR 'mendelian disease' OR 'mendelian disorder' OR 'mendelian inheritance disease' OR 'mendelian inheritance disorder' OR 'mendelian inherited disease' OR 'mendelian inherited disorder' OR 'mendelian inherited syndrome' OR 'mendelian syndrome' OR 'mono-genic disease' OR 'monogenic disorder' OR 'monogene disease' OR 'monogene disorder' OR 'monogenetic disease' OR 'monogenetic disorder' OR 'monogenetic syndrome' OR 'monogenic disease' OR 'monogenic disorder' OR 'monogenic syndrome' OR 'single gene disease' OR 'single gene disorder' OR 'single gene syndrome') OR 'primary immunodeficiency disease'/exp OR 'primary immunodeficiency disorder'/exp OR 'primary immune deficiency'/exp OR 'inborn errors of immunity'/exp) AND ('eye disease'/exp OR 'disease, eye' OR 'eye disease' OR 'eye diseases' OR 'eye diseases, hereditary' OR 'eye disorder' OR 'eye manifestations' OR 'hereditary eye disease' OR 'hereditary eye diseases' OR 'neovascularisation, eye' OR 'neovascularization, eye' OR 'ocular abnormalities' OR 'ocular abnormality' OR 'ocular disease' OR 'ocular disorder' OR 'ocular disturbance' OR 'oculopathy' OR 'ophthalmic abnormality' OR 'ophthalmic disease' OR 'ophthalmic disorder' OR 'ophthalmic disturbance' OR 'ophthalmopathology' OR 'ophthalmopathy' OR 'eye inflammation'/exp OR 'eye inflammation' OR 'inflammation, eye' OR |

|  |                                                                                                                                                         |
|--|---------------------------------------------------------------------------------------------------------------------------------------------------------|
|  | 'ocular inflammation' OR 'ophthalmitis' OR 'eye infection'/exp OR 'eye infection' OR 'eye infections' OR 'intraocular infection' OR 'ocular infection') |
|--|---------------------------------------------------------------------------------------------------------------------------------------------------------|

# SEARCH STRATEGY Virtual Health Library (VHL) – DATE 21 MARCH 2022

| Search                                                                                                                                                                        | Search                                                                                         |
|-------------------------------------------------------------------------------------------------------------------------------------------------------------------------------|------------------------------------------------------------------------------------------------|
| <p>Search Strategy</p> <p>Results</p> <p>n=10,948</p> <p>Those from MEDLINE are eliminated because we already have them with Pubmed and Embase, therefore there were 603.</p> | <p>(Primary Immunodeficiency Diseases) AND (Eye Diseases) OR (Eye Infections) OR (Uveitis)</p> |

**Supplementary tables.**

**Table S1.** Qualitative synthesis of ocular manifestations

| <b>Author, Year.</b>           | <b>Country</b> | <b>Name of IEI</b>                                                                                                                                                                                                                                                                                                                                                                                                                                                                                                                                                                                                                                                    | <b>Patients with IEI</b> | <b>Patients with IEI and ocular manifestations</b> | <b>Type of ocular manifestation</b>                                                                                                                                                   |
|--------------------------------|----------------|-----------------------------------------------------------------------------------------------------------------------------------------------------------------------------------------------------------------------------------------------------------------------------------------------------------------------------------------------------------------------------------------------------------------------------------------------------------------------------------------------------------------------------------------------------------------------------------------------------------------------------------------------------------------------|--------------------------|----------------------------------------------------|---------------------------------------------------------------------------------------------------------------------------------------------------------------------------------------|
| Yaz I, et al. 2021 [46].       | Turkey         | Leukocyte adhesion deficiency Type I                                                                                                                                                                                                                                                                                                                                                                                                                                                                                                                                                                                                                                  | 15                       | 1                                                  | Conjunctivitis                                                                                                                                                                        |
| Azizi G, et al. 2020 [16].     | Iran           | Common variable immunodeficiency, hyper-IgM syndrome, agammaglobulinemia                                                                                                                                                                                                                                                                                                                                                                                                                                                                                                                                                                                              | 310                      | 50                                                 | Conjunctivitis                                                                                                                                                                        |
| Yadav R, et al. 2020 [17].     | India          | Severe combined immune deficiency, Inborn errors of IFN- $\gamma$ immunity, Combined immunodeficiency, Chronic granulomatous disease, Leucocyte Adhesion Deficiency type1.                                                                                                                                                                                                                                                                                                                                                                                                                                                                                            | 52                       | 1                                                  | Eye telangiectasias                                                                                                                                                                   |
| Bistrizter J, et al.2021 [47]. | Israel         | Ataxia telangiectasia                                                                                                                                                                                                                                                                                                                                                                                                                                                                                                                                                                                                                                                 | 15                       | 2                                                  | Nystagmus                                                                                                                                                                             |
| Deepti S, et al.2021 [18].     | India          | Deficiency of adenosine deaminase, STING-associated vasculopathy infantile-onset, Spondyloenchondro-dysplasia with Immune Dysregulation, Cryopyrin-Associated Periodic Syndromes, NLR Family, Pyrin domain-containing, Familial Mediterranean fever, Autoinflammation and PLCG2-associated antibody deficiency and immune dysregulation, TNF receptor-associated periodic syndrome, A20 haploinsufficiency, Laccase Domain Containing, Deficiency of Interleukin 1 Receptor Antagonist, TRNA nucleotidyl transferase, Pyogenic Arthritis, Pyoderma gangrenosum and Acne, Coatamer complex 1 protein alpha subunit syndrome, Caspase Recruitment Domain Family Member. | 44                       | 6                                                  | Ocular inflammation, opacity in the eye, eye swelling, conjunctivitis, blurred vision, papilledema, optic atrophy, corneal epithelial defect with corneal ulcers and corneal opacity. |
| Sukaiti N, et al. 2021 [19].   | Australia      | Severe combined immune deficiency                                                                                                                                                                                                                                                                                                                                                                                                                                                                                                                                                                                                                                     | 36                       | 4                                                  | Eye infections (Klebsiella pneumonia, Haemophilus influenzae, Salmonella species)                                                                                                     |

|                                   |                          |                                                                                                                                                                                                                                                                                      |    |    |                                                    |
|-----------------------------------|--------------------------|--------------------------------------------------------------------------------------------------------------------------------------------------------------------------------------------------------------------------------------------------------------------------------------|----|----|----------------------------------------------------|
| Ferre E, et al. 2016 [20].        | United States of America | Autoimmune polyendocrinopathy with candidiasis and ectodermal dystrophy                                                                                                                                                                                                              | 35 | 4  | Keratoconjunctivitis                               |
| Ceyda Tunkan C, et al. 2017 [21]. | Turkey                   | Primary immunodeficiency Disorders                                                                                                                                                                                                                                                   | 92 | 1  | Uveitis                                            |
| Luo J, et al. 2021 [48].          | China                    | Wiskott-Aldrich Syndrome                                                                                                                                                                                                                                                             | 10 | 10 | CMV retinitis                                      |
| Boyarchuk O, et al. 2020 [22].    | Ukraine                  | Ataxia telangiectasia                                                                                                                                                                                                                                                                | 64 | 49 | Oculomotor apraxia, nystagmus, eye telangiectasias |
| Al-Sulaiman R, et al. 2020 [49].  | Qatar                    | Griscelli syndrome type 2                                                                                                                                                                                                                                                            | 12 | 2  | Strabismus                                         |
| Yeh Y, et al. 2020 [71].          | Taiwan                   | X-linked agammaglobulinemia                                                                                                                                                                                                                                                          | 19 | 2  | Deafness-dystonia-optic neuropathy (DDON) syndrome |
| Barkai T, et al. 2020 [23].       | Israel                   | Chronic granulomatous disease                                                                                                                                                                                                                                                        | 16 | 1  | Panuveitis                                         |
| Qureshia S, et al. 2020 [50].     | Pakistan                 | Severe combined immunodeficiency, Agammaglobulinemia/hypogammaglobulinemia, Wiskott-Aldrich Syndrome, Immunodeficiency Centromeric Instability and Facial Anomalies Syndrome, Hermansky-Pudlak Syndrome, Chronic granulomatous disease, Leukocyte adhesion deficiency, C3 deficiency | 20 | 2  | Oculocutaneous albinism                            |

|                                    |              |                                                                                                                                                                                                                                                                                                                                                                                                                                                                                                                                                           |    |    |                                                                                                                                |
|------------------------------------|--------------|-----------------------------------------------------------------------------------------------------------------------------------------------------------------------------------------------------------------------------------------------------------------------------------------------------------------------------------------------------------------------------------------------------------------------------------------------------------------------------------------------------------------------------------------------------------|----|----|--------------------------------------------------------------------------------------------------------------------------------|
| Massaad M, et al. 2020 [24].       | Kuwait       | C3 deficiency, RAG-1 deficiency, RAG-2 deficiency, Artemis deficiency, RFXANK-mediated MHC II deficiency, ICOS deficiency, DOCK2 deficiency, DOCK8 deficiency, Wiskott–Aldrich syndrome, DiGeorge syndrome, STAT5b deficiency, ICF syndrome with no documented genetic defect, AID deficiency, NF-kB2 deficiency , Selective IgA deficiency, CVID with no documented genetic defect, Chediak-Higashi syndrome, Fas deficiency, FasL deficiency, LRBA deficiency, APECED, IL-10 deficiency, CYBA deficiency, NCF2 deficiency, Blau syndrome, C4 deficiency | 57 | 6  | Uveitis, retinitis, chorioiditis, iriditis                                                                                     |
| Faruk Incecik F, et al. 2020 [51]. | Turkey       | Ataxia telangiectasia                                                                                                                                                                                                                                                                                                                                                                                                                                                                                                                                     | 31 | 2  | Oculomotor apraxia                                                                                                             |
| Marques I, et al. 2019 [52].       | Brazil       | Chediak Higashi syndrome                                                                                                                                                                                                                                                                                                                                                                                                                                                                                                                                  | 14 | 4  | Ocular albinism, decreased retinal pigmentation, nystagmus                                                                     |
| Papadopoulou C, et al. 2019 [53].  | Multicentric | Chronic granulomatous disease, Chronic mucocutaneous candidiasis, A20 haploinsufficiency, Periodic fevers with immunodeficiency and thrombocytopenia                                                                                                                                                                                                                                                                                                                                                                                                      | 10 | 3  | Uveitis, conjunctivitis                                                                                                        |
| Esenboga S, et al. 2017 [25].      | Turkey       | XL-agammaglobulinemia                                                                                                                                                                                                                                                                                                                                                                                                                                                                                                                                     | 32 | 2  | Conjunctivitis                                                                                                                 |
| Lodice A, et al. 2017 [26].        | Italy        | Ataxia telangiectasia                                                                                                                                                                                                                                                                                                                                                                                                                                                                                                                                     | 15 | 15 | Refractive errors, strabismus, fixation abnormalities, saccadic impairment, abnormal smooth pursuit, abnormal ocular movements |
| Mariani L, et al. 2017 [72].       | France       | Ataxia telangiectasia                                                                                                                                                                                                                                                                                                                                                                                                                                                                                                                                     | 17 | 10 | Nystagmus                                                                                                                      |
| Akturk H, et al. 2017 [27].        | Turkey       | Ataxia telangiectasia                                                                                                                                                                                                                                                                                                                                                                                                                                                                                                                                     | 91 | 84 | Oculocutaneous telangiectasia, nystagmus                                                                                       |
| Coulter T, et al. 2017 [28].       | Non declared | Activated phosphoinositide 3-kinase delta syndrome                                                                                                                                                                                                                                                                                                                                                                                                                                                                                                        | 53 | 13 | Conjunctivitis, orbital cellulitis, dacryocystitis, herpetic keratitis                                                         |

|                                  |          |                                                                                                                                                                                                                                                                                                                                                                                                                                                                                                |     |     |                                                                                                                                                                                                                                      |
|----------------------------------|----------|------------------------------------------------------------------------------------------------------------------------------------------------------------------------------------------------------------------------------------------------------------------------------------------------------------------------------------------------------------------------------------------------------------------------------------------------------------------------------------------------|-----|-----|--------------------------------------------------------------------------------------------------------------------------------------------------------------------------------------------------------------------------------------|
| Blazing S, et al. 2016 [29].     | Slovenia | Autoimmune lymphoproliferative syndrome, Activated phosphoinositide 3-kinase delta deficiency, Autoimmune polyendocrinopathy candidiasis ectodermal dysplasia, Ataxia telangiectasia, Deficiency of C2 component of complement, Common variable immunodeficiency, Immunoglobulin A deficiency, Lipopolysaccharide responsive beige-like anchor deficiency, Mucosa-associated lymphoid tissue lymphoma translocation 1 deficiency, Shwachman-Diamond syndrome, Severe combined immunodeficiency | 247 | 5   | Keratoconjunctivitis, allergic rhinoconjunctivitis                                                                                                                                                                                   |
| Nanthapisal S, et al. 2016 [30]. | England  | Adenosine deaminase 2 deficiency                                                                                                                                                                                                                                                                                                                                                                                                                                                               | 15  | 1   | Optic nerve atrophy                                                                                                                                                                                                                  |
| Patiroglu T, et al. 2016 [54].   | Turkey   | Oculocutaneous albinism                                                                                                                                                                                                                                                                                                                                                                                                                                                                        | 20  | 11  | Nystagmus, lack of pigmentation in the iris and fundus, atrophic changes of the peripheral retina, strabismus                                                                                                                        |
| Salman M.S, et al. 2015 [31].    | Canada   | Ataxia telangiectasia                                                                                                                                                                                                                                                                                                                                                                                                                                                                          | 184 | 115 | Reduced visual acuity, optic disc abnormality, pupillary examination abnormality, visual field abnormality, strabismus, gaze-evoked nystagmus, impaired smooth pursuit, hypometric saccades, hypermetric saccades, impaired ductions |
| Méneret A, et al. 2014 [73].     | France   | Ataxia telangiectasia                                                                                                                                                                                                                                                                                                                                                                                                                                                                          | 67  | 13  | Dysmetric saccades, eye telangiectasia, ocular movements abnormalities                                                                                                                                                               |
| Nagai K., et al. 2013 [55].      | Japan    | Chediak-higashi syndrome                                                                                                                                                                                                                                                                                                                                                                                                                                                                       | 15  | 14  | Oculocutaneous albinism.                                                                                                                                                                                                             |
| Greenberger S, et al. 2013 [32]. | Israel   | Ataxia telangiectasia                                                                                                                                                                                                                                                                                                                                                                                                                                                                          | 32  | 31  | Ocular telangiectasia (interpalpebral bulbar conjunctiva), pigmentary anomalies included cafe-au-lait macules, hypopigmented macules, and melanocytic nevi, oculocutaneous albinism                                                  |



|                                   |                                       |                                                                              |     |     |                                                                                                                                                                                                                                                                                                                                                                               |
|-----------------------------------|---------------------------------------|------------------------------------------------------------------------------|-----|-----|-------------------------------------------------------------------------------------------------------------------------------------------------------------------------------------------------------------------------------------------------------------------------------------------------------------------------------------------------------------------------------|
| Malgorzara P, et al. 2013 [56].   | Poland                                | X-linked agammaglobulinemia                                                  | 33  | 6   | Conjunctivitis                                                                                                                                                                                                                                                                                                                                                                |
| Shaikh A, et al. 2010 [74].       | Switzerland, United States of America | Ataxia telangiectasia                                                        | 13  | 13  | Horizontal gaze-evoked nystagmus in primary gaze, vertical nystagmus, impaired visual suppression                                                                                                                                                                                                                                                                             |
| Alaaeldin F, et al. 2010 [33].    | Egypt                                 | Chediak–Higashi syndrome, Hermansky–Pudlak syndrome, Oculocutaneous albinism | 113 | 113 | Oculocutaneous albinism                                                                                                                                                                                                                                                                                                                                                       |
| Tsilou E, et al. 2010 [34].       | United States of America              | Dyskeratosis congenita, Fanconi anemia                                       | 50  | 31  | Cataracts, palpebral epicanthus, ptosis, limbal neovascularization, embryotoxon, anomalies of the lacrimal drainage system (absence of punctum, nasolacrimal obstruction), scar entropion, keratoconjunctivitis, exudative retinopathy, microcornea, microphthalmia, myopia, astigmatism, granular retinal pigment epithelial changes, retinal detachment, vascular sheathing |
| Shaikh A, et al. 2009 [35].       | United States of America              | Ataxia telangiectasia                                                        | 13  | 13  | Nystagmus, sadistic movements (microsaccade oscillations and square wave saccadic intrusions)                                                                                                                                                                                                                                                                                 |
| Al-Muhsen S, et al. 2009 [76].    | Saudi Arabia                          | Chronic Granulomatous Disease                                                | 32  | 14  | Seborrheic blepharitis, stye, episcleritis, bilateral active anterior uveitis with posterior synchiae, ring-shaped corneal scarring of the inferior stroma, chorioretinal lesions                                                                                                                                                                                             |
| Khan A, et al. 2008 [57].         | Saudi Arabia                          | Ataxia telangiectasia                                                        | 11  | 11  | Saccadic dysfunction, delayed convergence, abolished convergence, exotropia, gaze-evoked nystagmus, downbeat nystagmus                                                                                                                                                                                                                                                        |
| Nofech-Mozes Y, et al. 2007 [36]. | Canada                                | Adenosine deaminase deficiency                                               | 14  | 2   | Rotary nystagmus, eye rolling                                                                                                                                                                                                                                                                                                                                                 |

|                                     |                                         |                                                                                             |     |     |                                                                                                                                                                            |
|-------------------------------------|-----------------------------------------|---------------------------------------------------------------------------------------------|-----|-----|----------------------------------------------------------------------------------------------------------------------------------------------------------------------------|
| Riise R, et al. 2007 [58].          | Norway                                  | Ataxia telangiectasia                                                                       | 10  | 10  | Convergent strabismus, photophobia, loss of fixation, nystagmus, abnormal saccades, conjunctival telangiectasias                                                           |
| Moin M, et al. 2007 [37].           | Iran                                    | Ataxia telangiectasia                                                                       | 104 | 104 | Apraxia of horizontal and vertical saccadic eye movements, conjunctival telangiectasia                                                                                     |
| Winkelstein J, et al. 2006 [38].    | United States of America (multicentric) | X-linked agammaglobulinemia                                                                 | 201 | 42  | Conjunctivitis                                                                                                                                                             |
| Rezaei N, et al. 2005 [59].         | Iran                                    | Cyclic neutropenia, Shwachman-Diamond syndrome, Kostmann syndrome, Chediak-Higashi syndrome | 26  | 2   | Conjunctivitis                                                                                                                                                             |
| Farr A, et al. 2002 [39].           | United States of America                | Ataxia telangiectasia                                                                       | 63  | 57  | Strabismus (endodeviation, exodeviation, hyperdeviation), conjunctival telangiectasia, myopia, hyperopia, nystagmus, optokinetic nystagmus, saccadic delay, Jerky pursuit  |
| Kivitie-Kallio S, et al. 2001 [40]. | Finland                                 | Cohen syndrome                                                                              | 29  | 29  | Antimongoloid slant of the eyelids, high-arched or wavy eyelids, long/thick eyelashes, thick eyebrows, retinitis pigmentosa-like retinal dystrophy, and progressive myopia |
| Boerkoel C, et al. 2000 [41].       | Canada                                  | Schimke immuno-osseous dysplasia                                                            | 39  | 7   | Corneal opacity, myopia and astigmatism, bilateral optic atrophy                                                                                                           |
| Kawame H, et al. 1998 [60].         | United States of America                | Kabuki syndrome                                                                             | 18  | 11  | Leukoma, eyelid ptosis, Marcus Gunn's phenomenon, strabismus, mild bilateral hypoplasia of the optic nerve, cataracts                                                      |

|                                |                          |                                                                         |    |    |                                                                                                                                                                               |
|--------------------------------|--------------------------|-------------------------------------------------------------------------|----|----|-------------------------------------------------------------------------------------------------------------------------------------------------------------------------------|
| Lewis R, et al. 1999 [61].     | United States of America | Ataxia telangiectasia                                                   | 56 | 56 | Spontaneous Nystagmus, Saccades, Slow vestibulo-ocular reflex, Slow Optokinetic response, Centrifugal diffraction in gaze retention, esotropia, impaired convergence          |
| Rudge P, et al. 1996 [62].     | England                  | X-Linked Agammaglobulinemia, Common Variable Immunodeficiency Phenotype | 13 | 5  | Nystagmus, chorioretinitis, restriction of eye movements, transient blurred vision, papilledema, retinitis pigmentosa, decreased visual acuity, constriction of visual fields |
| Ziv Y, et al. 1992 [42].       | Israel                   | Ataxia telangiectasia                                                   | 19 | 19 | Congenital cataract, nystagmus                                                                                                                                                |
| Palestine A, et al. 1983 [63]. | United States of America | Neutrophil dysfunction                                                  | 32 | 9  | Keratitis, chorioretinal scars, blepharoconjunctivitis                                                                                                                        |
| Latkany P, et al. 2002 [64].   | United States of America | Systemic granulomatosis                                                 | 16 | 16 | Anterior uveitis, posterior uveitis, cataracts, glaucoma, multifocal choroiditis                                                                                              |
| Woods C, et al. 1992 [43].     | British islands          | Ataxia telangiectasia                                                   | 70 | 70 | Oculomotor apraxia                                                                                                                                                            |
| Goldblatt D, et al. 1999 [75]. | England                  | Chronic granulomatous disease                                           | 38 | 9  | Chorioretinal lesions                                                                                                                                                         |
| Alyasin S, et al. 2019 [65].   | Iran                     | Ataxia telangiectasia                                                   | 18 | 13 | Oculocutaneous telangiectasia, oculomotor apraxia                                                                                                                             |
| Cohen L, et al. 1984 [66].     | United States of America | Ataxia telangiectasia                                                   | 12 | 12 | Conjunctival telangiectasias, hypopigmented macula                                                                                                                            |
| Farina L, et al. 1994 [67].    | Italy                    | Ataxia telangiectasia                                                   | 12 | 12 | Nystagmus, oculomotor apraxia, oculocutaneous telangiectasias                                                                                                                 |

|                                    |                                                    |                                                                                                                                                                                                                                                                                                                                                                                  |      |     |                                                                                                                                                                                                                                                                                                                                                                                                            |
|------------------------------------|----------------------------------------------------|----------------------------------------------------------------------------------------------------------------------------------------------------------------------------------------------------------------------------------------------------------------------------------------------------------------------------------------------------------------------------------|------|-----|------------------------------------------------------------------------------------------------------------------------------------------------------------------------------------------------------------------------------------------------------------------------------------------------------------------------------------------------------------------------------------------------------------|
| JaY B, et al. 1968 [68].           | England                                            | Ichthyosis                                                                                                                                                                                                                                                                                                                                                                       | 62   | 62  | Ectropion, ichthyosis of the eyelids vulgari, thickening of the conjunctiva, corneal changes, superficial punctate keratitis, stromal changes, lenticular alterations, peripheral granular pigmentation, Marcus Gunn phenomenon                                                                                                                                                                            |
| Kim S, et al. 2003 [69].           | South Korea                                        | Chronic granulomatous disease                                                                                                                                                                                                                                                                                                                                                    | 17   | 6   | Chorioretinal lesions, RPE atrophy, chorioretinal atrophy, vision loss, peripheral retinal ischemia, neovascular membrane, macular edema                                                                                                                                                                                                                                                                   |
| Veerapandiyan A, et al. 2011 [44]. | United States of America (multicentric)            | DiGeorge syndrome                                                                                                                                                                                                                                                                                                                                                                | 50   | 20  | Short palpebral fissures, hypertelorism, epicanthal folds, hooded eyelids, upslanting palpebral fissures, downslanting palpebral fissures, and ptosis.                                                                                                                                                                                                                                                     |
| Pham M, et al. 2022 [7].           | Multicentric (United States of America and Canada) | Immunodeficiencies affecting cellular and humoral immunity, CID with associated or syndromic features, Predominantly antibody deficiencies, Immune dysregulation, Defects in phagocytosis, Defects in intrinsic and innate immunity, Autoinflammatory disorders, Complement deficiencies, Phenocopies of inborn errors of immunity, and Unknown or undetermined immunodeficiency | 4624 | 519 | Conjunctivitis, blepharitis, stye, chalazion, corneal infection, chorioretinitis, endophthalmitis, keratoconjunctivitis, ocular VZV, vitritis, episcleritis, infected eye prosthesis, orbital cellulitis, choroidal mass<br>Decreased vision, uveitis, photophobia, diseases of the retina, cataracts, glaucoma, optic nerve disease, corneal disease, eye movement disorders, ptosis, strabismus, dry eye |
| Manjunath M, et al. 2020 [45].     | India                                              | Ataxia telangiectasia                                                                                                                                                                                                                                                                                                                                                            | 100  | 100 | Ocular telangiectasia, ocular apraxia, impaired pursuit and slow saccades, nystagmus                                                                                                                                                                                                                                                                                                                       |

|                            |                          |                                                                              |    |    |                                                                         |
|----------------------------|--------------------------|------------------------------------------------------------------------------|----|----|-------------------------------------------------------------------------|
| Huryn L, et al. 2022 [70]. | United States of America | Retinal dystrophy, optic nerve edema, splenomegalia, anhidrosis and headache | 11 | 11 | Retinal dystrophy, optic nerve edema, anhidrosis, cystoid macular edema |
|----------------------------|--------------------------|------------------------------------------------------------------------------|----|----|-------------------------------------------------------------------------|

IgM: Immunoglobulin M, IFN- $\gamma$ : Interferon-gamma, STING: Stimulator of Interferon Genes, NLR: Nod-Like receptor, TNF: Tumor necrosis factor, C3: Complement component 3, RAG-1: Recombination-activating gene 1, RAG-2: Recombination-activating gene 2, RFXANK: RFXAP-containing ankyrin repeat, MHC-II: Major histocompatibility complex type II, ICOS: Inducible costimulator, DOCK2: Dedicator of cytokinesis 2, DOCK8: Dedicator of cytokinesis 8, STAT5b: Signal transducer and activator of transcription 5B, ICF: Immunodeficiency with centromeric instability and facial anomalies, AID: Activation-Induced Cytidine Deaminase, NF- $\kappa$ B2: Nuclear factor kappa-B subunit 2 gene, IgA: Immunoglobulin A, CVID: Common variable immunodeficiency, LRBA: Lipopolysaccharide-responsive beige-like anchor protein, APECED: Autoimmune polyendocrinopathy candidiasis ectodermal dystrophy, IL-10: Interleukin-10, NCF2: Neutrophil cytosolic factor 2, C4: Complement component 4, C2: Complement component 2, and XL: X-linked.

## Supplementary figures legends.

**Figure S1.** Risk of bias traffic-light plot of cohort studies

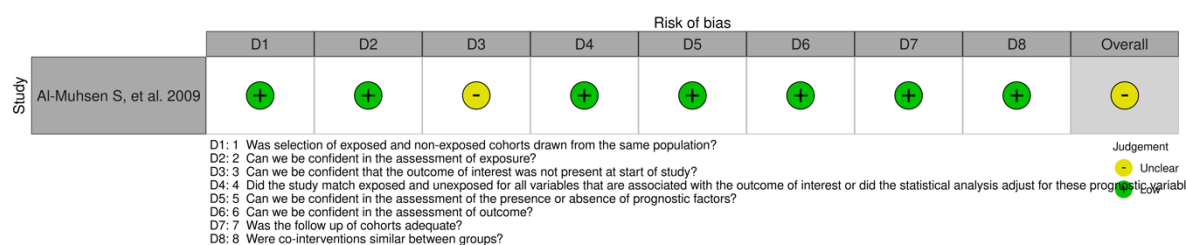

Domain scoring: Definitely yes (low); Probably yes or Probably no (some concern); Definitely no (High).

**Figure S2.** Risk of bias traffic-light plot of case-control studies.

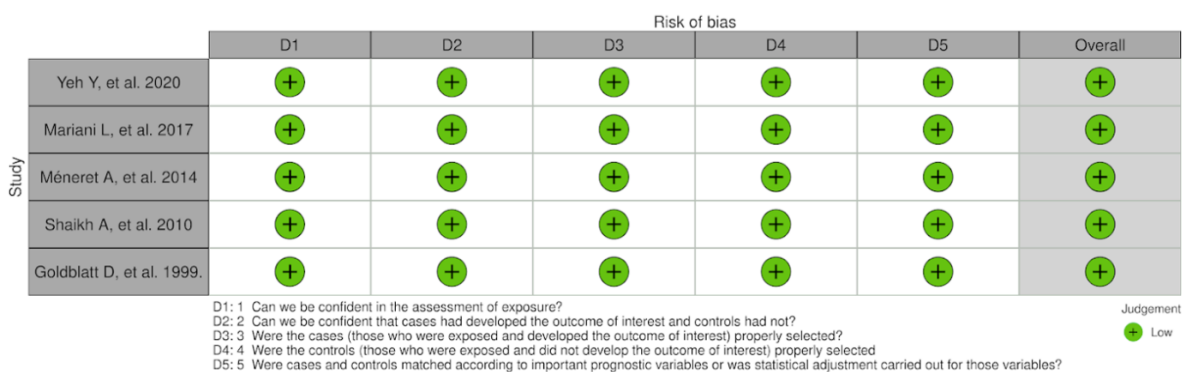

Domain scoring: Definitely yes (low); Probably yes or Probably no (some concern); Definitely no (High).

**Figure S3.** Risk of bias traffic-light plot of cross-sectional studies.

|                               | Risk of bias |    |         |
|-------------------------------|--------------|----|---------|
|                               | D1           | D2 | Overall |
| Azizi G, et al. 2020          |              |    |         |
| Yadav R, et al. 2020          |              |    |         |
| Deepti S, et al. 2021         |              |    |         |
| Sukaiti N, et al. 2021        |              |    |         |
| Ferre E, et al. 2016          |              |    |         |
| Ceyda Tuncan C, et al. 2017   |              |    |         |
| Boyarchuk O, et al. 2020      |              |    |         |
| Barkai T, et al. 2020         |              |    |         |
| Massaad M, et al. 2020        |              |    |         |
| Esenboga S, et al. 2017       |              |    |         |
| Lodice A, et al. 2017         |              |    |         |
| Akturk H, et al. 2017         |              |    |         |
| Coulter T, et al. 2017        |              |    |         |
| Blazing S, et al. 2016        |              |    |         |
| Nanthapisal S, et al. 2016    |              |    |         |
| Salman M.S, et al. 2015       |              |    |         |
| Greenberger S, et al. 2013    |              |    |         |
| Alaaeldin F, et al. 2010      |              |    |         |
| Tsilou E, et al. 2010         |              |    |         |
| Shaikh A, et al. 2009         |              |    |         |
| Nofech-Mozes Y, et al. 2007   |              |    |         |
| Moin M, et al. 2007           |              |    |         |
| Winkelstein J, et al. 2006    |              |    |         |
| Farr A, et al. 2002           |              |    |         |
| Kivitie-Kallio S, et al. 2001 |              |    |         |
| Boerkoel C, et al. 2000       |              |    |         |
| Ziv Y, et al. 1992            |              |    |         |
| Woods C, et al. 1992          |              |    |         |
| Veerapandiyan A, et al. 2011  |              |    |         |
| Pham M, et al. 2022           |              |    |         |
| Manjunath M, et al. 2020      |              |    |         |

Study

D1: Bias due to External Validity - Domain scoring: 0-1 (High); 2(Some Concerns); 3+(Low)  
D2: Bias due to Internal Validity - Domain scoring: 0-2 (High); 3(Some Concerns); 4+(Low)

Judgement  
 High  
 Unclear  
 Low

Domain scoring: External Validity - Domain scoring: 0-1 (High); 2(Some Concerns); 3+(Low). Internal Validity - Domain scoring: 0-2 (High); 3(Some Concerns); 4+(Low).

**Figure S4.** Risk of bias traffic-light plot of case-series studies.

|                              | Risk of bias |    |    |    |         |
|------------------------------|--------------|----|----|----|---------|
|                              | D1           | D2 | D3 | D4 | Overall |
| Yaz I, et al. 2021           |              |    |    |    |         |
| Bistrizter J, et al.2021     |              |    |    |    |         |
| Luo J, et al. 2021           |              |    |    |    |         |
| Al-Sulaiman R, et al. 2020   |              |    |    |    |         |
| Qureshia S, et al. 2020      |              |    |    |    |         |
| Faruk Incecik F, et al. 2020 |              |    |    |    |         |
| Marques I, et al. 2019       |              |    |    |    |         |
| Papadopoulou C, et al. 2019  |              |    |    |    |         |
| Patirogluh T, et al. 2016    |              |    |    |    |         |
| Nagai K., et al. 2013        |              |    |    |    |         |
| Malgorzara P, et al. 2013    |              |    |    |    |         |
| Khan A, et al. 2008          |              |    |    |    |         |
| Riise R, et al. 2007         |              |    |    |    |         |
| Rezaei N, et al. 2005        |              |    |    |    |         |
| Kawame H, et al. 1998        |              |    |    |    |         |
| Lewis R, et al. 1999         |              |    |    |    |         |
| Rudge P, et al. 1996         |              |    |    |    |         |
| Palestine A, et al. 1983     |              |    |    |    |         |
| Latkany P, et al. 2002       |              |    |    |    |         |
| Alyasin S, et al. 2019       |              |    |    |    |         |
| Cohen L, et al. 1984         |              |    |    |    |         |
| Farina L, et al. 1994        |              |    |    |    |         |
| JaY B, et al. 1968           |              |    |    |    |         |
| Kim S, et al. 2003           |              |    |    |    |         |
| Huryñ L, et al. 2022         |              |    |    |    |         |

Study

D1: Selection  
D2: Ascertainment  
D3: Causality  
D4: Reporting

Judgement  
 High  
 Unclear  
 Low

Domain scoring: Selection - Domain scoring: 0-1 (High); 2(Some Concerns); 4+(Low).  
Ascertainment - Domain scoring: 0-2 (High); 3(Some Concerns); 4+(Low). Causality -  
Domain scoring: 0-2 (High); 3(Some Concerns); 4+(Low). Reporting - Domain scoring: 0-2  
(High); 3(Some Concerns); 4+(Low).
